# Supplementary material
Source: MDPI journal article supplement (https://www.mdpi.com/2673-4605/4/1/2)
Supplement: s1 [file s1]

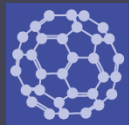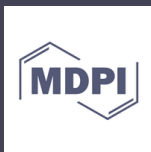

*nanomaterials*

2nd International Online-Conference  
on Nanomaterials

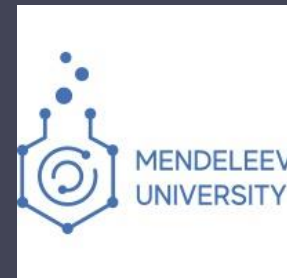

# Self-assembly of nanoclusters in molybdenum blue dispersions in the presence of organic reducing agent

Maria Myachina \*, Natalia Gavrilova, Daria Harlamova, Victor  
Nazarov

*D. Mendeleev University of Chemical Technology of Russia,  
Moscow, Russia*

*e-mail: [mmyachina@muctr.ru](mailto:mmyachina@muctr.ru)*

# Polyoxometalate clusters

1

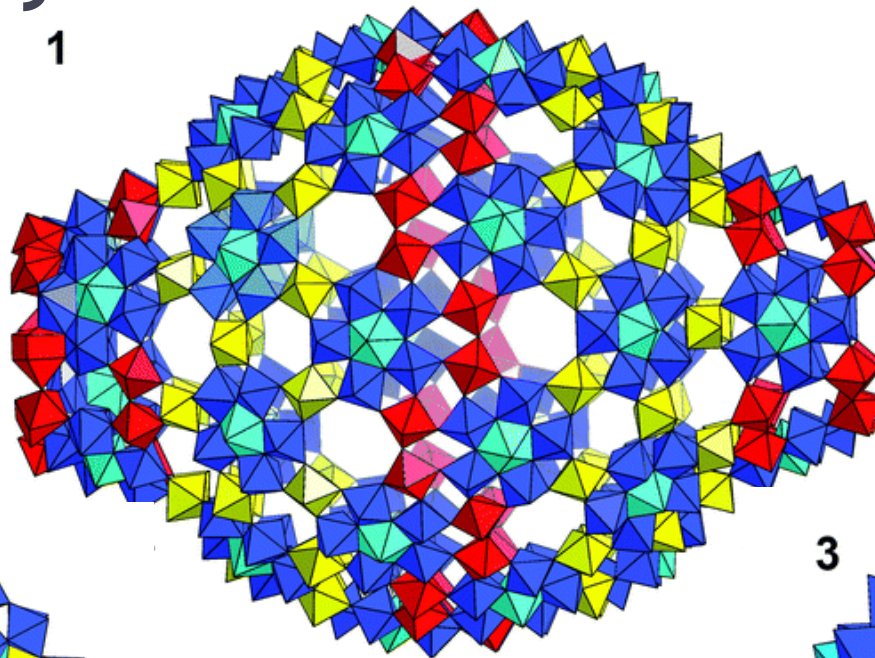

$\{\text{Mo}_{138}\}$ -3,5 nm,  
toroidal shape\*

2

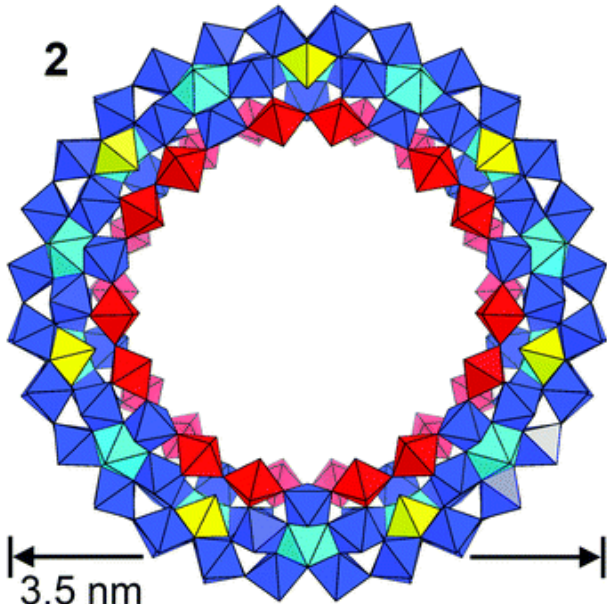

$\{\text{Mo}_{368}\}$ -5,5 nm,  
lemon like shape\*

3

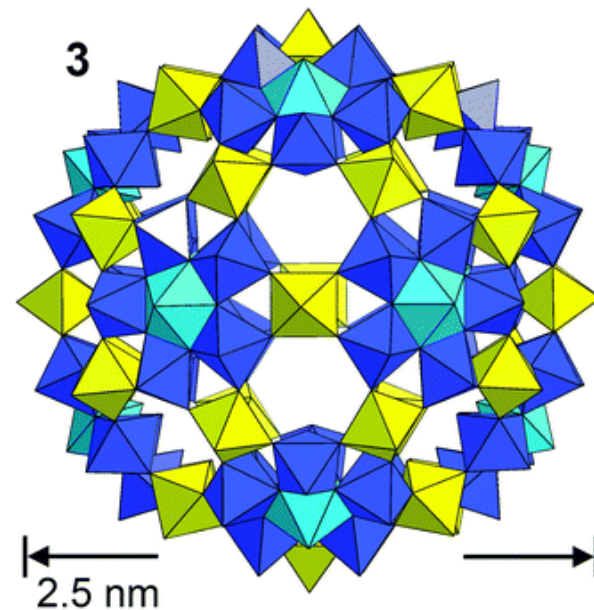

# Perspective application of molybdenum blue dispersions

Medicine

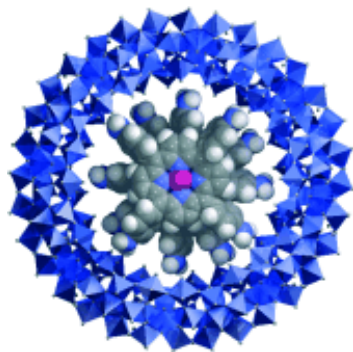

Targeted drug delivery \*

Catalysis

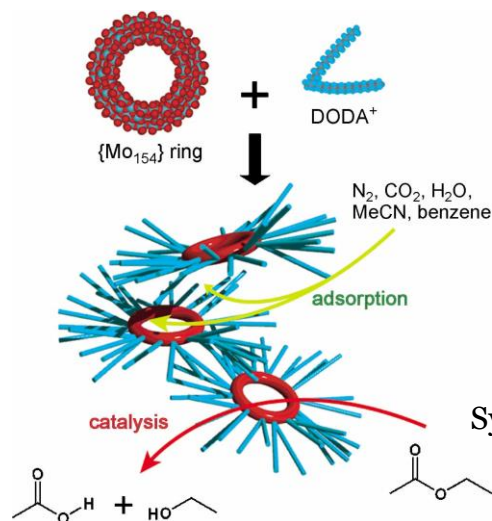

Catalytic hydrolysis of ethyl acetate\*\*

Analytical chemistry

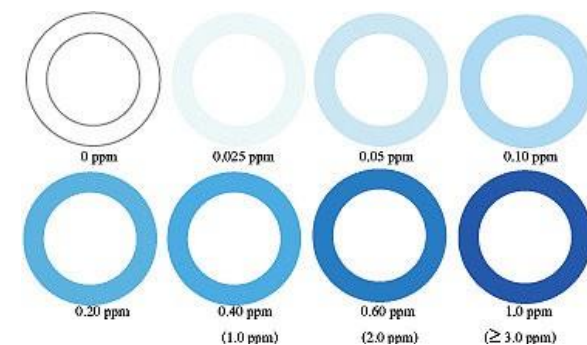

Express analysis of phosphate

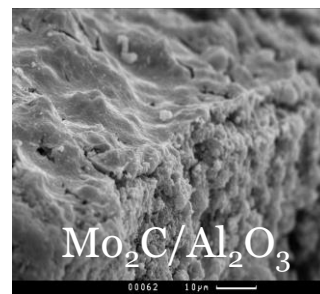

Synthesis of catalysts Mo<sub>2</sub>C/Al<sub>2</sub>O<sub>3</sub> by sol-gel method

\*A. Tsuda, E. Hirahara, Y. – S. Kim, H. Tanaka. A molybdenum crown cluster forms discrete inorganic – organic nanocomposites with metalloporphyrins // Angew. Chem. Int. Ed. V. 43. 2004. P.6327.  
 \*\*S.-I. Noro, R. Tsunashima, Y. Kamiya. Adsorption and catalytic properties of the inner nanospace of a gigantic ring-shaped polyoxometalate Cluster//Angew. Chem. Int. Ed. V.48. 2009. .P. 8703.

# Synthesis of molybdenum blue dispersions

Compounds Mo (VI)



- Chemical reduction

(inorganic reducing agents: Al, Sn, SnCl<sub>2</sub>, NaBH<sub>4</sub>, etc.)

(organic reducing agents: glucose, hydroquinone, ascorbic acid, etc.)

- Photochemical reduction

- Electrochemical reduction

- $\gamma$  - radiation

# Synthesis of molybdenum blue dispersions

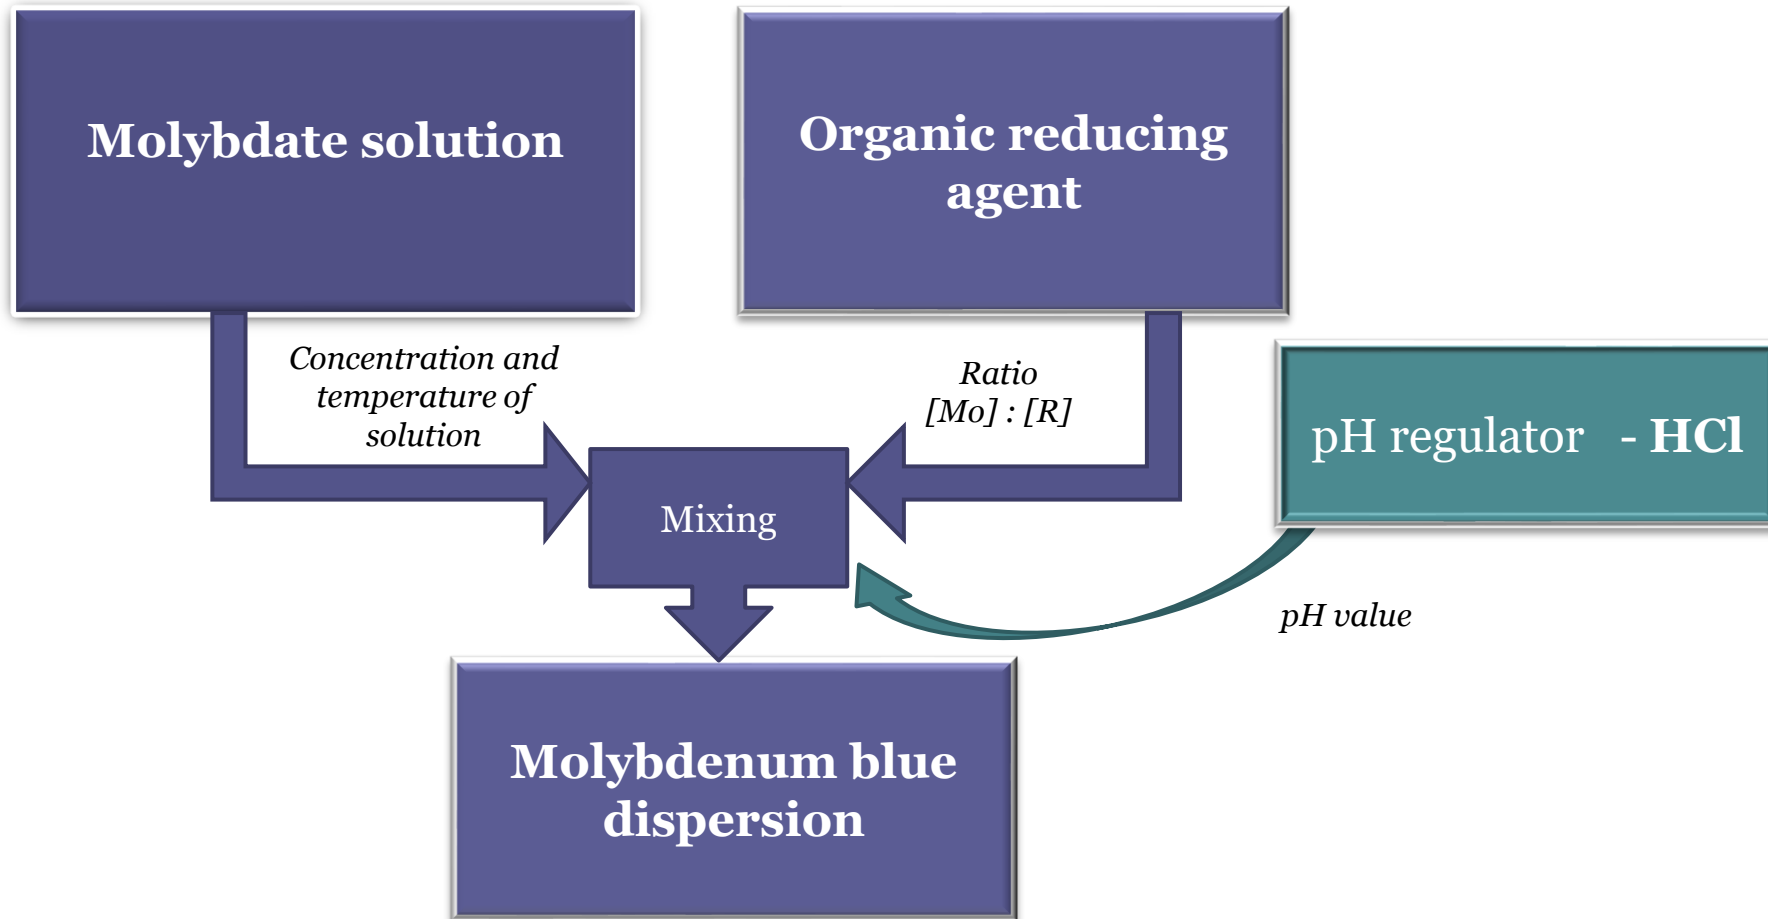

# Synthesis conditions

| Parameter                                                       | Reducing agent |              |               |
|-----------------------------------------------------------------|----------------|--------------|---------------|
|                                                                 | Glucose        | Hydroquinone | Ascorbic acid |
| <b>Synthesis conditions</b>                                     |                |              |               |
| Interval [R]/[Mo]                                               | 5,0-9,0        | 3,0-6,0      | 0,6 – 5,0     |
| Interval [H <sup>+</sup> ]/[Mo]                                 | 0,5-0,8        | 1,0-4,0      | 0,5-1,0       |
| <b>Time proceeding</b>                                          |                |              |               |
| Time to reach constant particle concentration, days             | < 20           | < 20         | < 10          |
| Time of maintaining a constant concentration of particles, days | > 60           | < 10         | > 30          |



# Formation of molybdenum blue dispersions

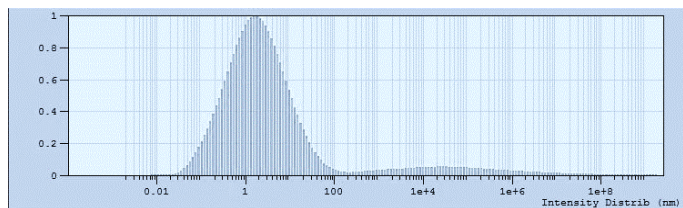

(a)

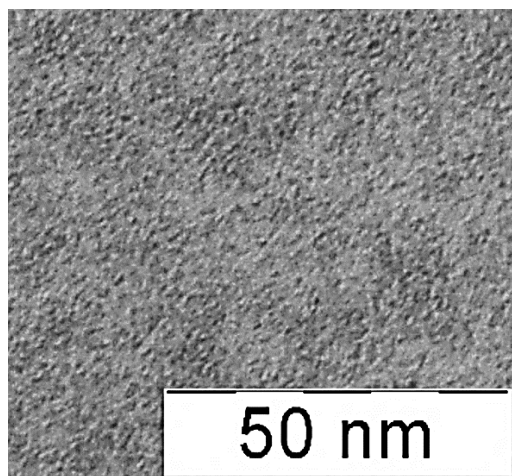

(b)

DLS distribution (a) and TEM-image (b) of molybdenum blue particles, synthesized by using ascorbic acid.

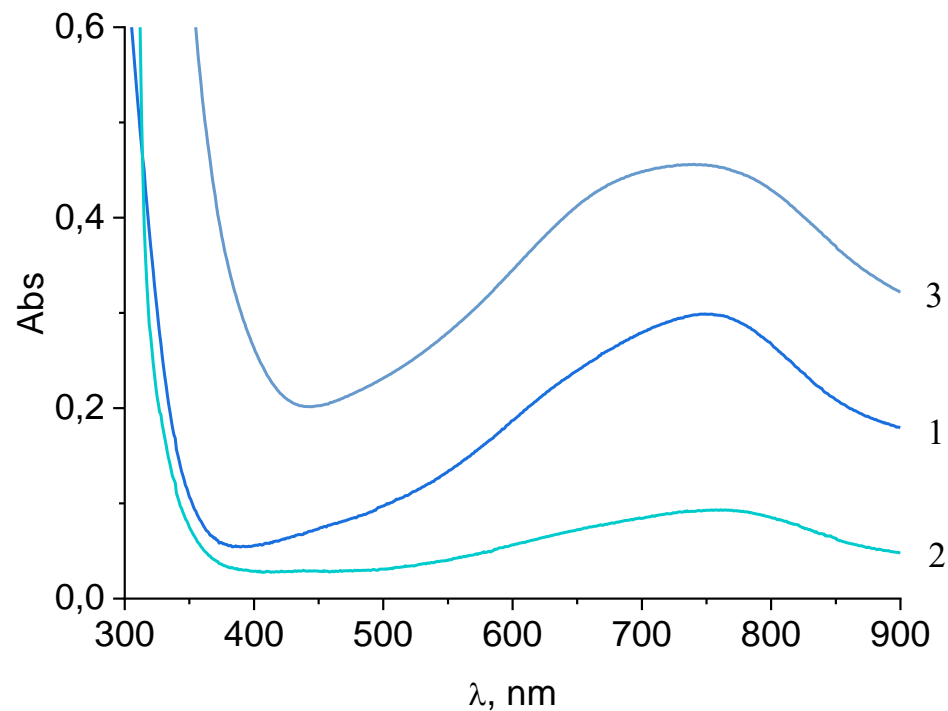

The electronic absorption spectrum of dispersion of molybdenum oxide clusters synthesized using various reducing agents: glucose (1), hydroquinone (2), ascorbic acid (3).

# Formation of molybdenum blue dispersions

## Time effect

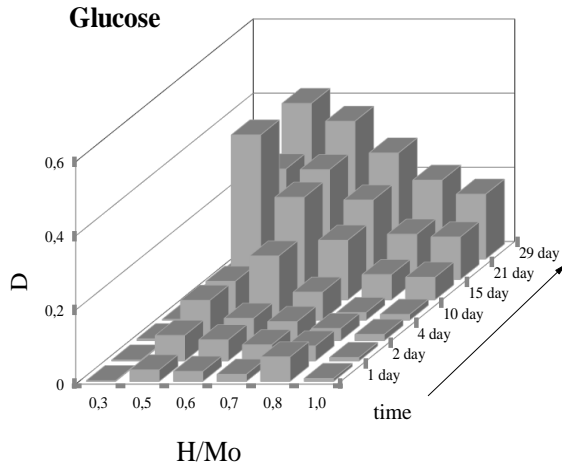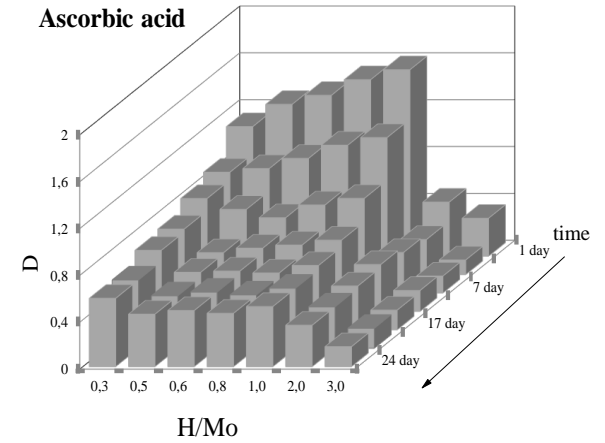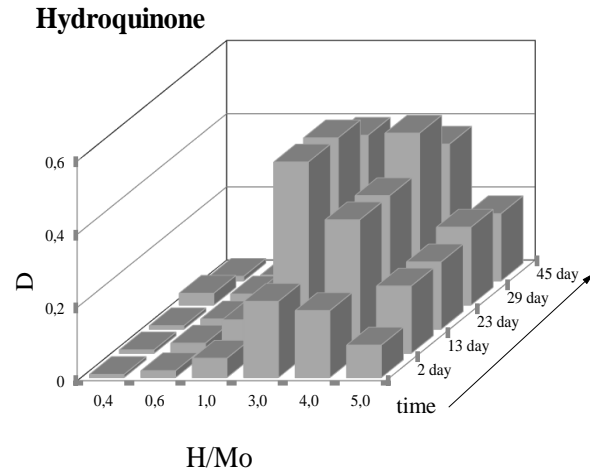

\* Hydrodynamic radius is determined by dynamic light scattering (Photocor Compact Z)



# Nanocluster characterization

## I. Uv-Vis and FTIR - spectroscopy

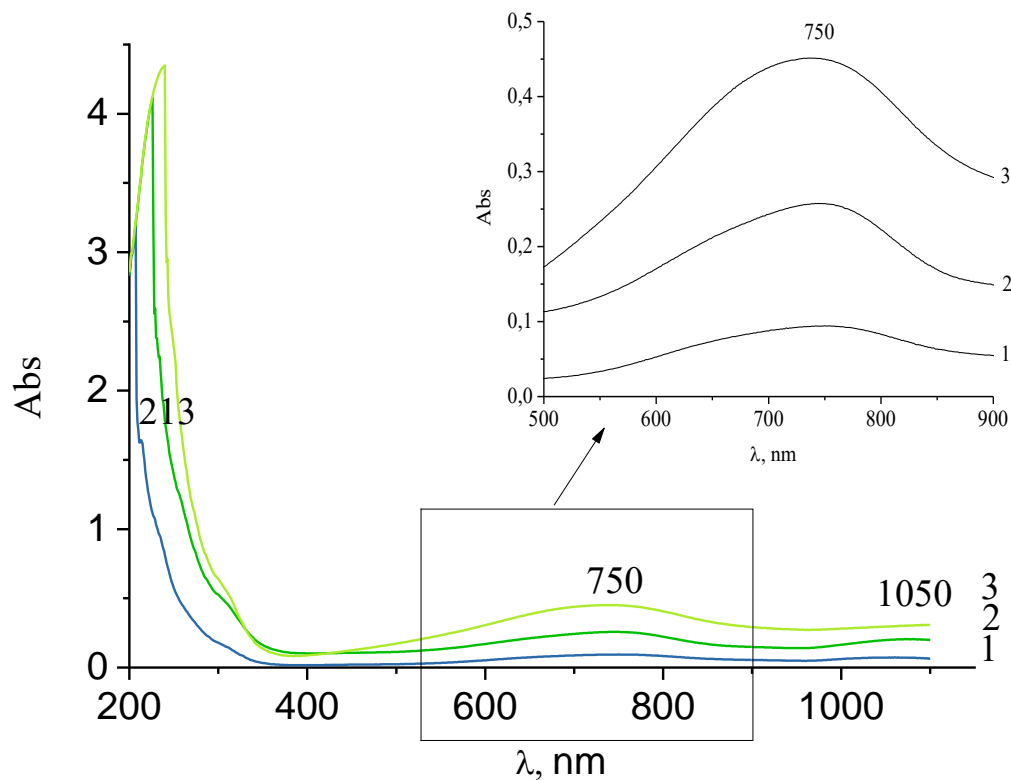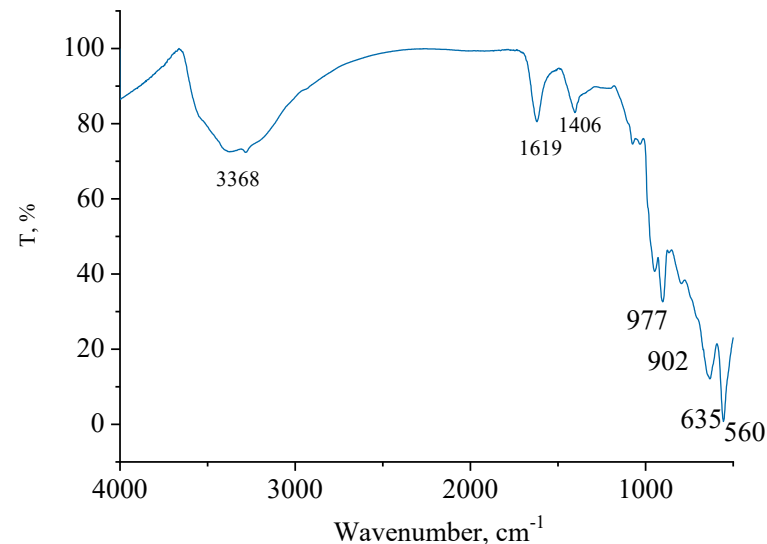

FTIR spectra of molybdenum oxide clusters isolated from dispersions synthesized by using glucose

| Band position, $\text{cm}^{-1}$ | Assignment                                                                           |
|---------------------------------|--------------------------------------------------------------------------------------|
| 3368s                           | $\nu(\text{OH}\cdots\text{H})$                                                       |
| 1620s                           | $\delta(\text{H}_2\text{O})$                                                         |
| 1406w                           | $\delta(\text{NH}_4^+)$                                                              |
| 973s, 904w                      | $\nu(\text{Mo}=\text{O})$                                                            |
| 737s, 634m                      | $\nu(\text{Mo}-\mu_2\text{O}-\text{Mo})$ or $\nu(\text{Mo}-\mu_3\text{O}-\text{Mo})$ |
| 561s                            | $\delta(\text{O}-\text{Mo}-\text{O})$                                                |

The electronic absorption spectrum of molybdenum oxide clusters isolated from dispersions synthesized using various reducing agents: glucose (1), hydroquinone (2), ascorbic acid (3).

# Nanocluster characterization

## II. XPS spectroscopy

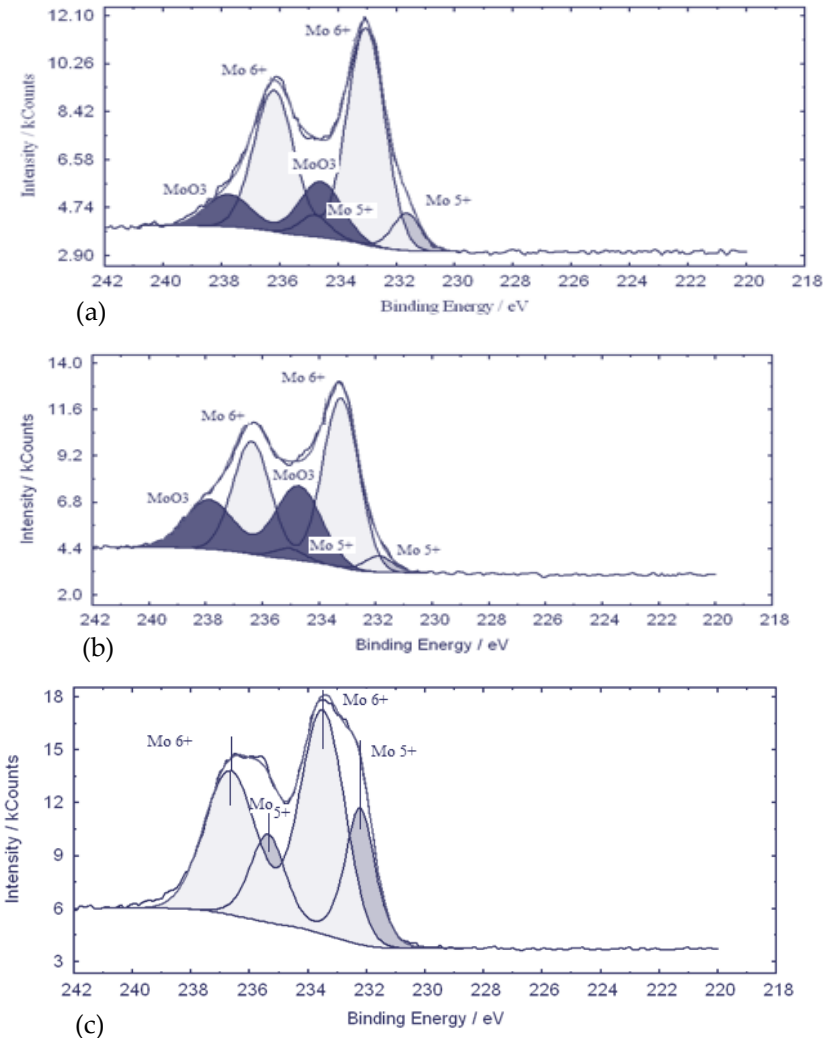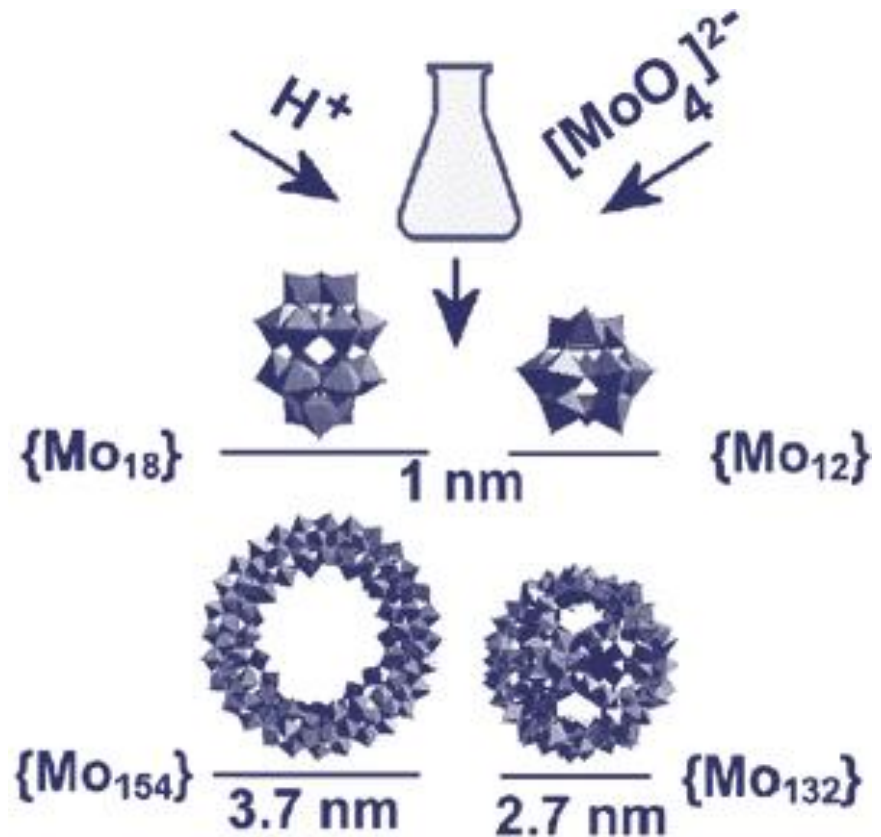

XPS spectrum of Mo (a) and O (b) of synthesized molybdenum clusters by using various reducing agents: glucose (a), hydroquinone (b), ascorbic acid (c).

\* H. N. Miras, E.F. Wilson, L. Cronin Unravelling the complexities of inorganic and supramolecular self-assembly in solution with electrospray and cryospray mass spectroscopy // Chem. Communi. 2009.P.1297 – 1311.

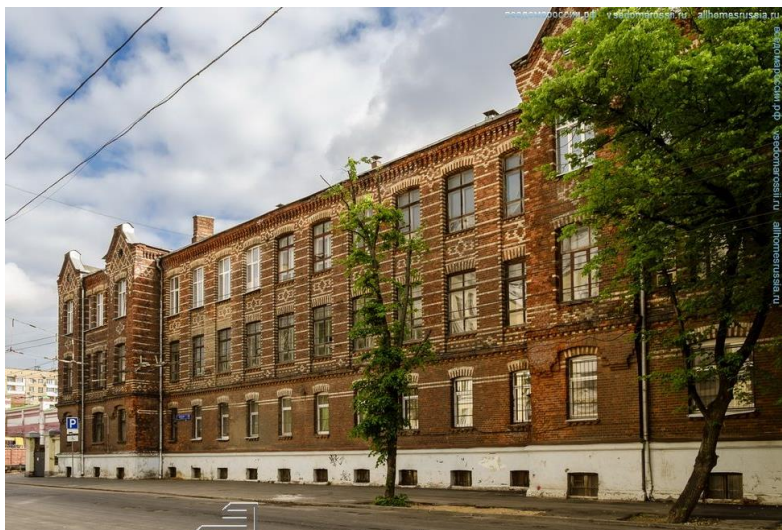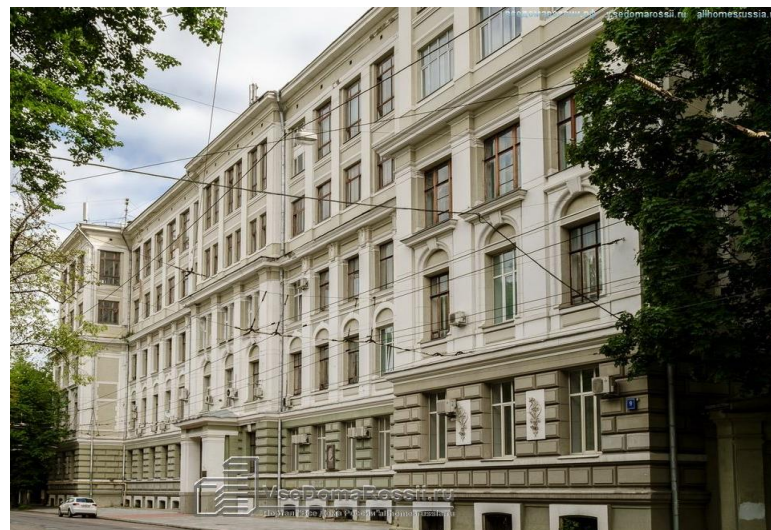

Thank you for  
attention !

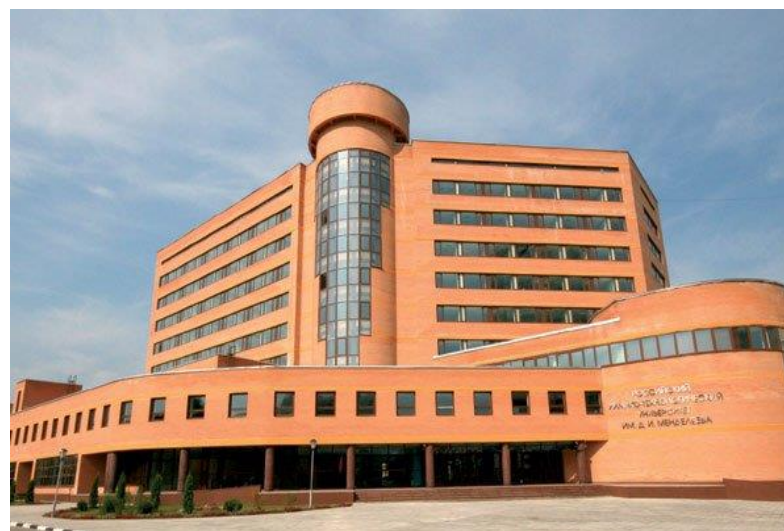

This research was funded by D. Mendeleev University of Chemical Technology, grant number 031 - 2020.
